# Supplementary material for: Sequence-regulated vinyl copolymers by metal-catalysed step-growth radical polymerization
Source: Springer Nature journal article supplement (doi:10.1038/ncomms1004), 2010-04-12
Supplement: 41467_2010_BFncomms1004_MOESM15_ESM.mol [file 41467_2010_BFncomms1004_MOESM15_ESM.mol]

  ChemDraw03161008132D

 25 25  0  0  0  0  0  0  0  0999 V2000
   -1.7858   -0.6174    0.0000 C   0  0  0  0  0  0  0  0  0  0  0  0
   -1.7858   -1.4416    0.0000 C   0  0  0  0  0  0  0  0  0  0  0  0
   -1.0721   -1.8536    0.0000 C   0  0  0  0  0  0  0  0  0  0  0  0
   -0.3584   -1.4416    0.0000 C   0  0  0  0  0  0  0  0  0  0  0  0
   -0.3584   -0.6174    0.0000 C   0  0  0  0  0  0  0  0  0  0  0  0
   -1.0721   -0.2054    0.0000 C   0  0  0  0  0  0  0  0  0  0  0  0
   -1.0721    0.6188    0.0000 C   0  0  0  0  0  0  0  0  0  0  0  0
   -1.7858    1.0308    0.0000 C   0  0  0  0  0  0  0  0  0  0  0  0
   -2.4995    0.6188    0.0000 C   0  0  0  0  0  0  0  0  0  0  0  0
    0.3553    0.6188    0.0000 C   0  0  0  0  0  0  0  0  0  0  0  0
   -0.3584    1.0308    0.0000 C   0  0  0  0  0  0  0  0  0  0  0  0
   -3.2132    1.0308    0.0000 C   0  0  0  0  0  0  0  0  0  0  0  0
    1.0698    1.0313    0.0000 C   0  0  0  0  0  0  0  0  0  0  0  0
    1.7843    0.6188    0.0000 O   0  0  0  0  0  0  0  0  0  0  0  0
    2.4988    1.0313    0.0000 C   0  0  0  0  0  0  0  0  0  0  0  0
    0.3553   -0.2062    0.0000 C   0  0  0  0  0  0  0  0  0  0  0  0
    1.0698   -0.6187    0.0000 C   0  0  0  0  0  0  0  0  0  0  0  0
    1.7843   -0.2062    0.0000 Cl  0  0  0  0  0  0  0  0  0  0  0  0
    1.0698   -1.4438    0.0000 C   0  0  0  0  0  0  0  0  0  0  0  0
    0.3553   -1.8563    0.0000 O   0  0  0  0  0  0  0  0  0  0  0  0
    1.7843   -1.8563    0.0000 O   0  0  0  0  0  0  0  0  0  0  0  0
    2.4988   -1.4438    0.0000 C   0  0  0  0  0  0  0  0  0  0  0  0
    1.0698    1.8563    0.0000 O   0  0  0  0  0  0  0  0  0  0  0  0
    3.2132    0.6188    0.0000 C   0  0  0  0  0  0  0  0  0  0  0  0
    3.2132   -1.8563    0.0000 C   0  0  0  0  0  0  0  0  0  0  0  0
  1  2  1  0      
  2  3  2  0      
  3  4  1  0      
  4  5  2  0      
  5  6  1  0      
  6  1  2  0      
  6  7  1  0      
  7  8  1  0      
  8  9  1  0      
 10 11  1  0      
 11  7  1  0      
  9 12  2  0      
 10 13  1  0      
 13 14  1  0      
 14 15  1  0      
 10 16  1  0      
 16 17  1  0      
 17 18  1  0      
 17 19  1  0      
 19 20  2  0      
 19 21  1  0      
 21 22  1  0      
 13 23  2  0      
 15 24  1  0      
 22 25  1  0      
M  END
